# Supplementary material
Source: PubMed Central journal article supplement (PMC8374730)
Supplement: jamacardiol-e213063-s002.pdf [file jamacardiol-e213063-s002.pdf]

## Data Sharing Statement

Samuel. Association of Atrial Fibrillation Burden With Health-Related Quality of Life After Atrial Fibrillation Ablation: Substudy of the Cryoballoon vs Contact-Force Atrial Fibrillation Ablation (CIRCA-DOSE) Randomized Clinical Trial. *JAMA Cardiol.* Published August 18, 2021. 10.1001/jamacardio.2021.3063

### Data

**Data available:** Yes

**Data types:** Deidentified participant data

**How to access data:** [jason.andrade@vch.ca](mailto:jason.andrade@vch.ca)

**When available:** December 31, 2021

### Supporting Documents

**Document types:** None

### Additional Information

**Who can access the data:** Reasonable data access requests will be considered by the steering committee

**Types of analyses:** Reasonable data access requests will be considered by the steering committee

**Mechanisms of data availability:** Reasonable data access requests will be considered by the steering committee
